# Supplementary material for: Factors Associated with High Live Release for Dogs at a Large, Open-Admission, Municipal Shelter
Source: PubMed Central journal article supplement (PMC5946129; doi:10.3390/ani8040045), 2018-03-28
Supplement: animals-08-00045-s001.pdf [file animals-08-00045-s001.pdf]

**Table S1.** Odds of live release and odds of live release within seven days for dog intakes at the Pima Animal Care Center according to the characteristics of the dogs.

|                                                | Odds of Live Release<br>(n = 18,958 Live Release/21,409 Dogs) |            |         |                                  |            |         | Odds of LOS $\leq$ 7 Days After Intake<br>(n = 12,651 Adopted to Public/18,958 Live Release Dogs) |            |         |                                  |            |         |
|------------------------------------------------|---------------------------------------------------------------|------------|---------|----------------------------------|------------|---------|---------------------------------------------------------------------------------------------------|------------|---------|----------------------------------|------------|---------|
|                                                | Univariate Logistic Regression                                |            |         | Multivariate Logistic Regression |            |         | Univariate Logistic Regression                                                                    |            |         | Multivariate Logistic Regression |            |         |
|                                                | OR                                                            | 95% CI     | p value | OR                               | 95% CI     | p value | OR                                                                                                | 95% CI     | p value | OR                               | 95% CI     | p value |
| Age category                                   |                                                               |            |         |                                  |            |         |                                                                                                   |            |         |                                  |            |         |
| Puppy <sup>a</sup><br>( $\leq$ 6 months)       | 1                                                             | n/a        |         | 1                                | n/a        |         | 1                                                                                                 | n/a        |         | 1                                | n/a        |         |
| Juvenile<br>(6 –12 months)                     | 0.95                                                          | 0.81; 1.12 | 0.57    | 0.72                             | 0.6; 0.86  | <0.001  | 0.48                                                                                              | 0.44; 0.53 | <0.001  | 0.48                             | 0.44; 0.53 | <0.001  |
| Young adult<br>(>1 year to less than<br>3 yrs) | 0.78                                                          | 0.67; 0.9  | <0.001  | 0.66                             | 0.56; 0.77 | <0.001  | 0.35                                                                                              | 0.32; 0.38 | <0.001  | 0.36                             | 0.33; 0.39 | <0.001  |
| Adult<br>(3 yrs to less than 8<br>years)       | 0.7                                                           | 0.61; 0.81 | <0.001  | 0.55                             | 0.47; 0.65 | <0.001  | 0.38                                                                                              | 0.35; 0.42 | <0.001  | 0.35                             | 0.32; 0.39 | <0.001  |
| Older adult<br>( $\geq$ 8 years)               | 0.47                                                          | 0.39; 0.57 | <0.001  | 0.36                             | 0.29; 0.45 | <0.001  | 0.45                                                                                              | 0.40; 0.52 | <0.001  | 0.39                             | 0.33; 0.45 | <0.001  |
| Sex                                            |                                                               |            |         |                                  |            |         |                                                                                                   |            |         |                                  |            |         |
| Female <sup>a</sup>                            | 1                                                             | n/a        |         | 1                                | n/a        |         | 1                                                                                                 | n/a        |         | 1                                | n/a        |         |
| Male                                           | 0.73                                                          | 0.66; 0.79 | <0.001  | 0.68                             | 0.61; 0.76 | <0.001  | 0.96                                                                                              | 0.91; 1.02 | 0.17    | 0.98                             | 0.92; 1.04 | 0.46    |
| In type                                        |                                                               |            |         |                                  |            |         |                                                                                                   |            |         |                                  |            |         |
| Owner surrender <sup>a</sup>                   | 1                                                             | n/a        |         | 1                                | n/a        |         | 1                                                                                                 | n/a        |         | 1                                | n/a        |         |
| Stray                                          | 0.9                                                           | 0.82; 0.98 | 0.016   | 1.25                             | 1.11; 1.39 | <0.001  | 0.95                                                                                              | 0.9; 1.01  | 0.09    | 0.98                             | 0.91; 1.05 | 0.51    |
| Stray <sup>b</sup>                             | 0.73                                                          | 0.67; 0.8  | <0.001  | 1.01                             | 0.9; 1.13  | 0.83    | n/a                                                                                               | n/a        |         | n/a                              | n/a        |         |
| Return from<br>adoption                        | 4.09                                                          | 2.73; 6.13 | <0.001  | 4.74                             | 3.02; 7.44 | <0.001  | 1.17                                                                                              | 1.01; 1.36 | 0.041   | 1.44                             | 1.22; 1.7  | <0.001  |
| Return from foster                             | 6.69                                                          | 4.06; 11   | <0.001  | 5.3                              | 3.13; 8.97 | <0.001  | 3.23                                                                                              | 2.68; 3.91 | <0.001  | 3.01                             | 2.44; 3.7  | <0.001  |
| Return from foster <sup>c</sup>                | 22.3                                                          | 5.5; 89.8  | <0.001  | 22.2                             | 5.48; 90.2 | <0.001  | 2.75                                                                                              | 2.09; 3.61 | <0.001  | 3.07                             | 2.45; 3.85 | <0.001  |
| Condition at intake                            |                                                               |            |         |                                  |            |         |                                                                                                   |            |         |                                  |            |         |

|                                          |      |            |        |      |            |        |      |            |        |      |            |        |
|------------------------------------------|------|------------|--------|------|------------|--------|------|------------|--------|------|------------|--------|
| No concerns <sup>a,d</sup>               | 1    | n/a        |        | 1    | n/a        |        | 1    | n/a        |        | 1    | n/a        |        |
| Minor concerns <sup>d</sup>              | 0.4  | 0.36; 0.45 | <0.001 | 0.44 | 0.38; 0.5  | <0.001 | 0.82 | 0.76; 0.89 | <0.001 | 0.76 | 0.69; 0.84 | <0.001 |
| Major concerns <sup>d</sup>              | 0.11 | 0.1; 0.12  | <0.001 | 0.13 | 0.12; 0.15 | <0.001 | 1.17 | 1.06; 1.3  | 0.002  | 1.04 | 0.92; 1.17 | 0.54   |
| Color                                    |      |            |        |      |            |        |      |            |        |      |            |        |
| Not black <sup>a</sup>                   | 1    | n/a        |        | 1    | n/a        |        | 1    | n/a        |        | 1    | n/a        |        |
| Black                                    | 1    | 0.91; 1.1  | 0.98   | 0.91 | 0.8; 1.03  | 0.15   | 1.03 | 0.97; 1.1  | 0.34   | 0.98 | 0.91; 1.06 | 0.58   |
| Estimated size <sup>e</sup>              |      |            |        |      |            |        |      |            |        |      |            |        |
| Small <sup>a</sup>                       | 1    | n/a        |        | 1    | n/a        |        | 1    | n/a        |        | 1    | n/a        |        |
| Medium                                   | 0.33 | 0.29; 0.37 | <0.001 | 0.42 | 0.35; 0.51 | <0.001 | 0.6  | 0.55; 0.64 | <0.001 | 0.6  | 0.55; 0.66 | <0.001 |
| Large                                    | 0.53 | 0.46; 0.6  | <0.001 | 0.5  | 0.42; 0.6  | <0.001 | 0.74 | 0.68; 0.79 | <0.001 | 0.69 | 0.64; 0.76 | <0.001 |
| Giant                                    | 0.38 | 0.3; 0.47  | <0.001 | 0.57 | 0.42; 0.76 | <0.001 | 0.74 | 0.63; 0.86 | <0.001 | 0.81 | 0.68; 0.97 | 0.025  |
| Number of breeds listed                  |      |            |        |      |            |        |      |            |        |      |            |        |
| Single breed listed                      | 1    | n/a        |        | 1    | n/a        |        | 1    | n/a        |        | 1    | n/a        |        |
| >1 breed listed                          | 1.16 | 1.06; 1.26 | <0.001 | 0.96 | 0.86; 1.08 | 0.49   | 0.79 | 0.75; 0.84 | <0.001 | 0.72 | 0.67; 0.77 | <0.001 |
| 'Blockhead'-type appearance <sup>f</sup> |      |            |        |      |            |        |      |            |        |      |            |        |
| No <sup>a</sup>                          | 1    | n/a        |        | 1    | n/a        |        | 1    | n/a        |        | 1    | n/a        |        |
| Yes                                      | 0.37 | 0.34; 0.41 | <0.001 | 0.46 | 0.41; 0.52 | <0.001 | 0.66 | 0.62; 0.7  | <0.001 | 0.72 | 0.67; 0.77 | <0.001 |

OR, odds ratio; 95% CI, 95% confidence interval for odds ratio; LOS, length of stay; n/a, not applicable. <sup>a</sup>reference category for OR; <sup>b</sup>When 2721 owner-reclaimed strays are excluded from analysis; <sup>c</sup>Excluding puppies and juvenile dogs; <sup>d</sup>Concerns include health and behavioral concerns; <sup>e</sup>based on estimated adult weight for primary listed breed: Small, <~35 lbs; Medium, ~35-65 lbs; Large, ~66-85 lbs; Giant, ~>86 lbs; <sup>f</sup>'Blockhead' type dog is a morphological category that included any dogs with either a primary or secondary breed attribution in the shelter database that could be consistent with the appearance of a stigmatized breed (e.g., American Staffordshire Terrier, American Pit Bull Terrier, Boxer, American Bulldog, Bull Mastiff, Canine Corso, Dogo Argentino, English Bulldog, Mastiff, 'Pit Bull'-type dog, Rottweiler); <sup>g</sup>Length of stay includes time for in-house surgery and recovery for intact dogs prior to release to adoptive home and does not necessarily just reflect time to adoption decision.
